# Supplementary material
Source: ML conference proceedings conference paper supplement (https://openreview.net/forum?id=VS7Dn31xuB)

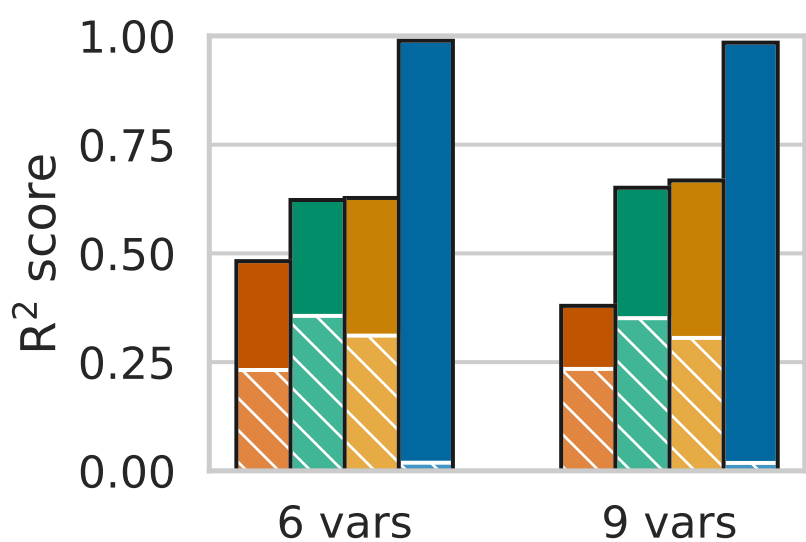

Supplement: supplementary_material [file attachment]

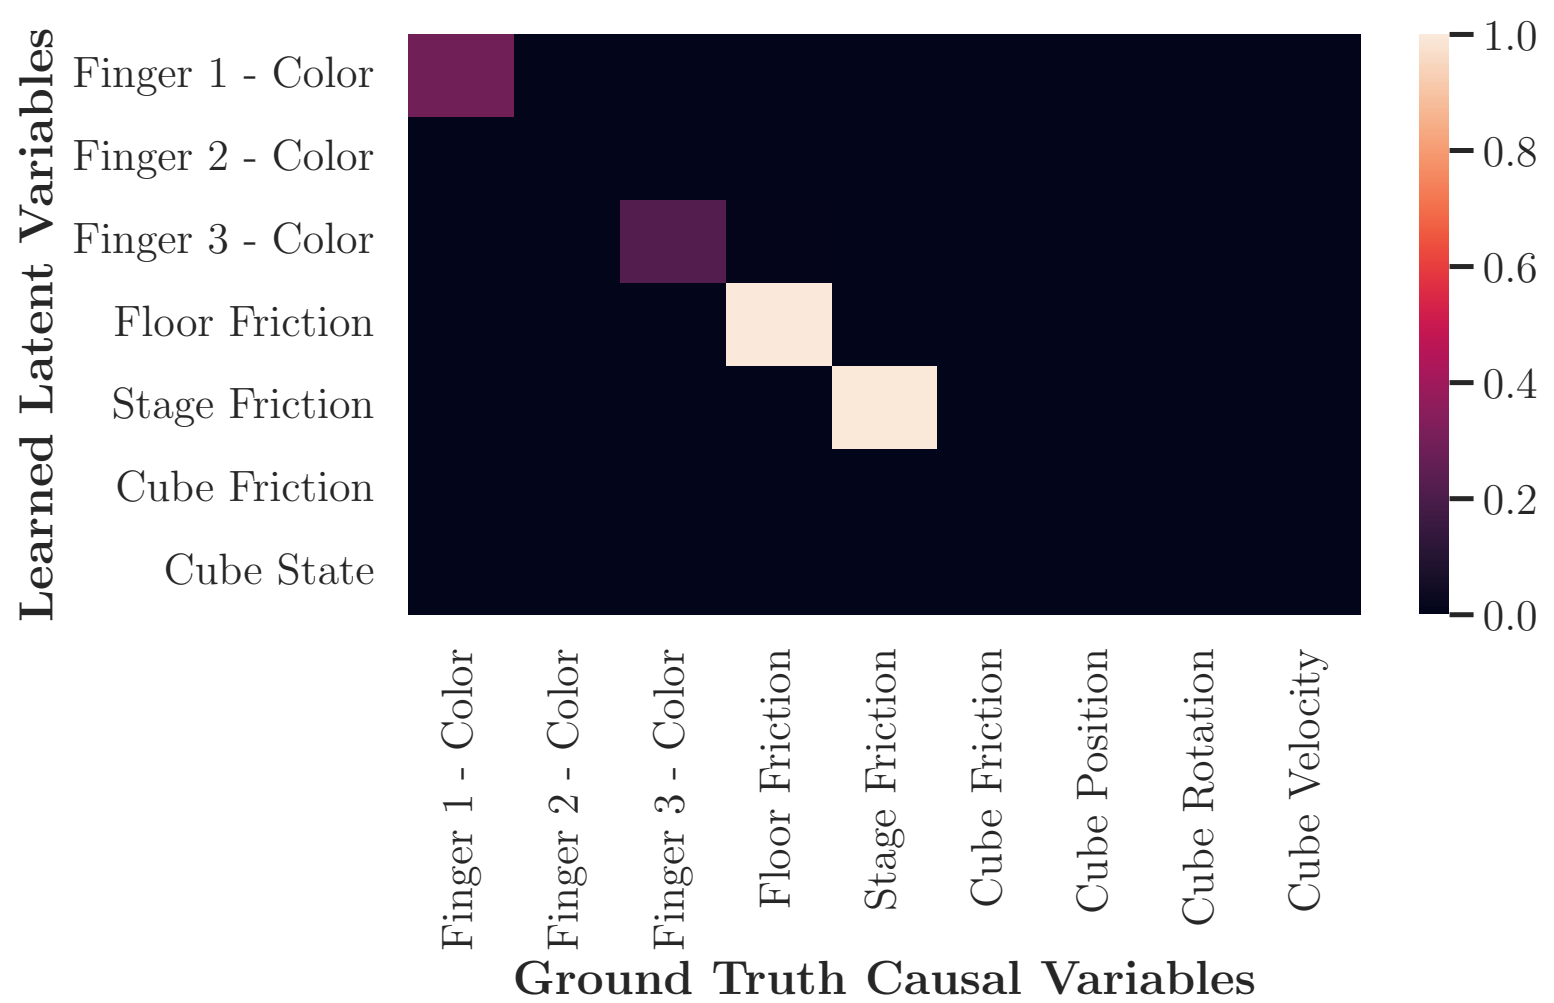

Supplement: supplementary_material [file attachment]

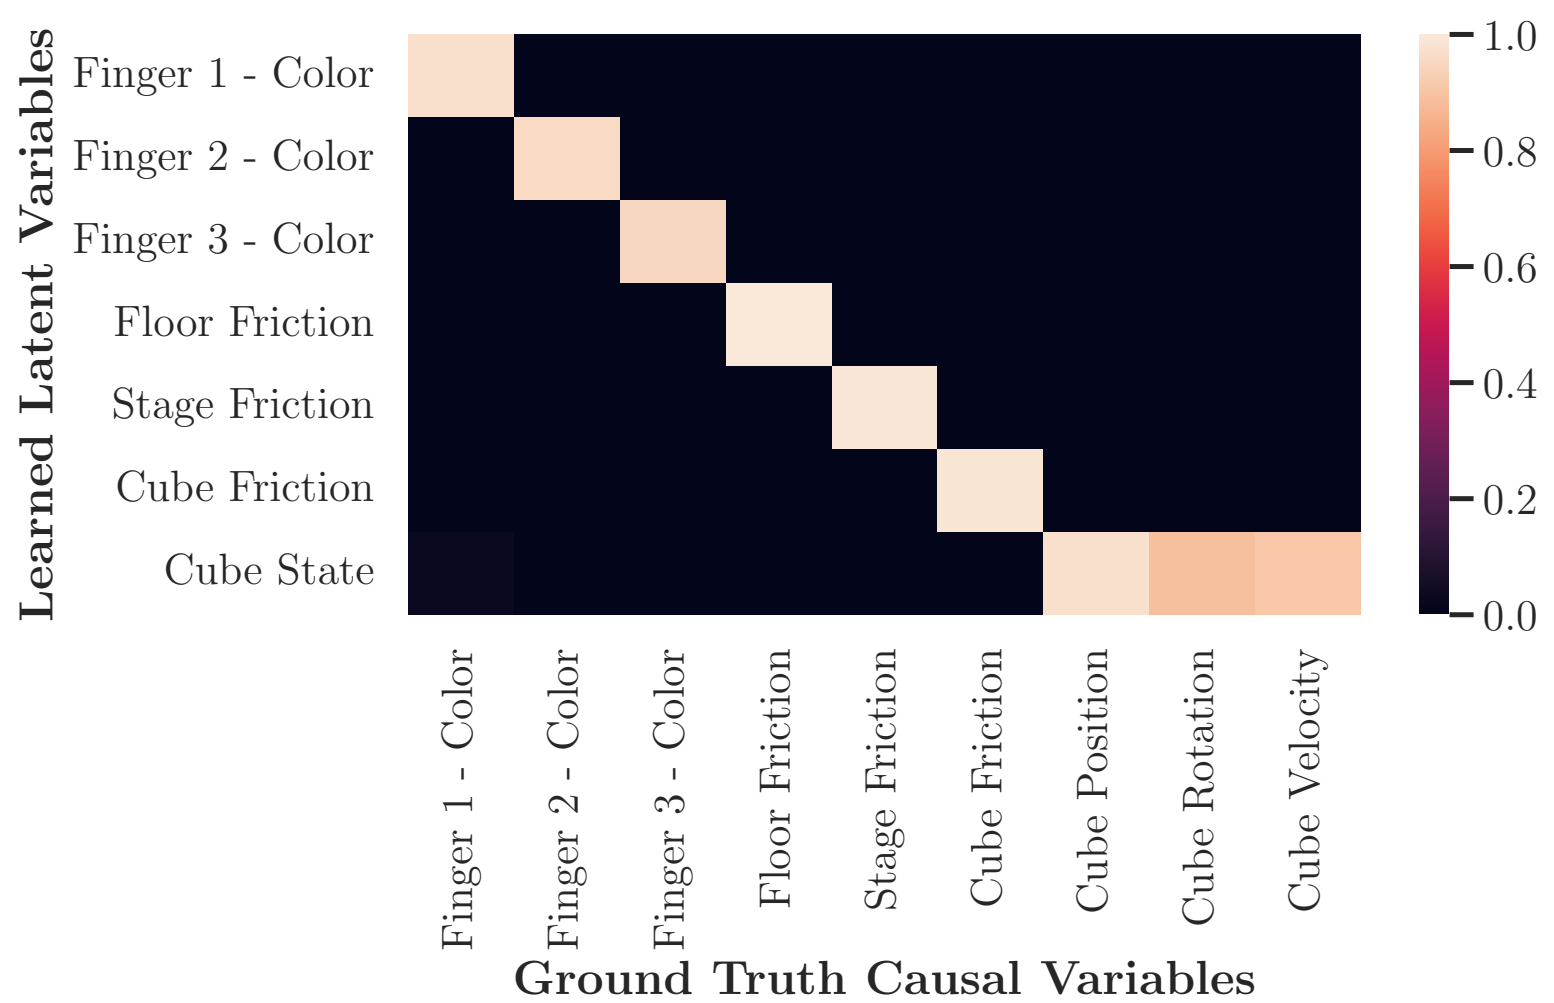

Supplement: supplementary_material [file attachment]

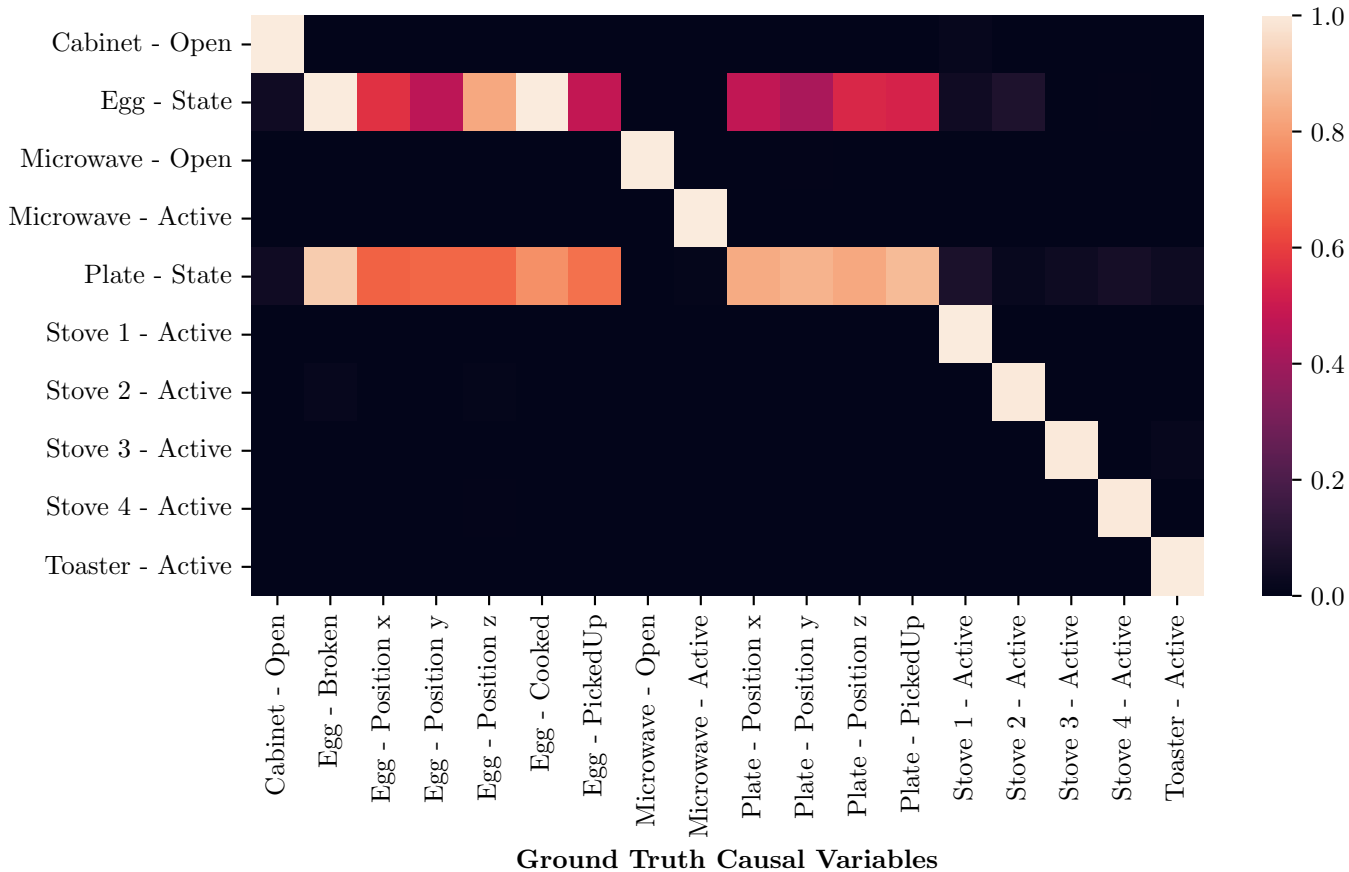

Supplement: supplementary_material [file attachment]

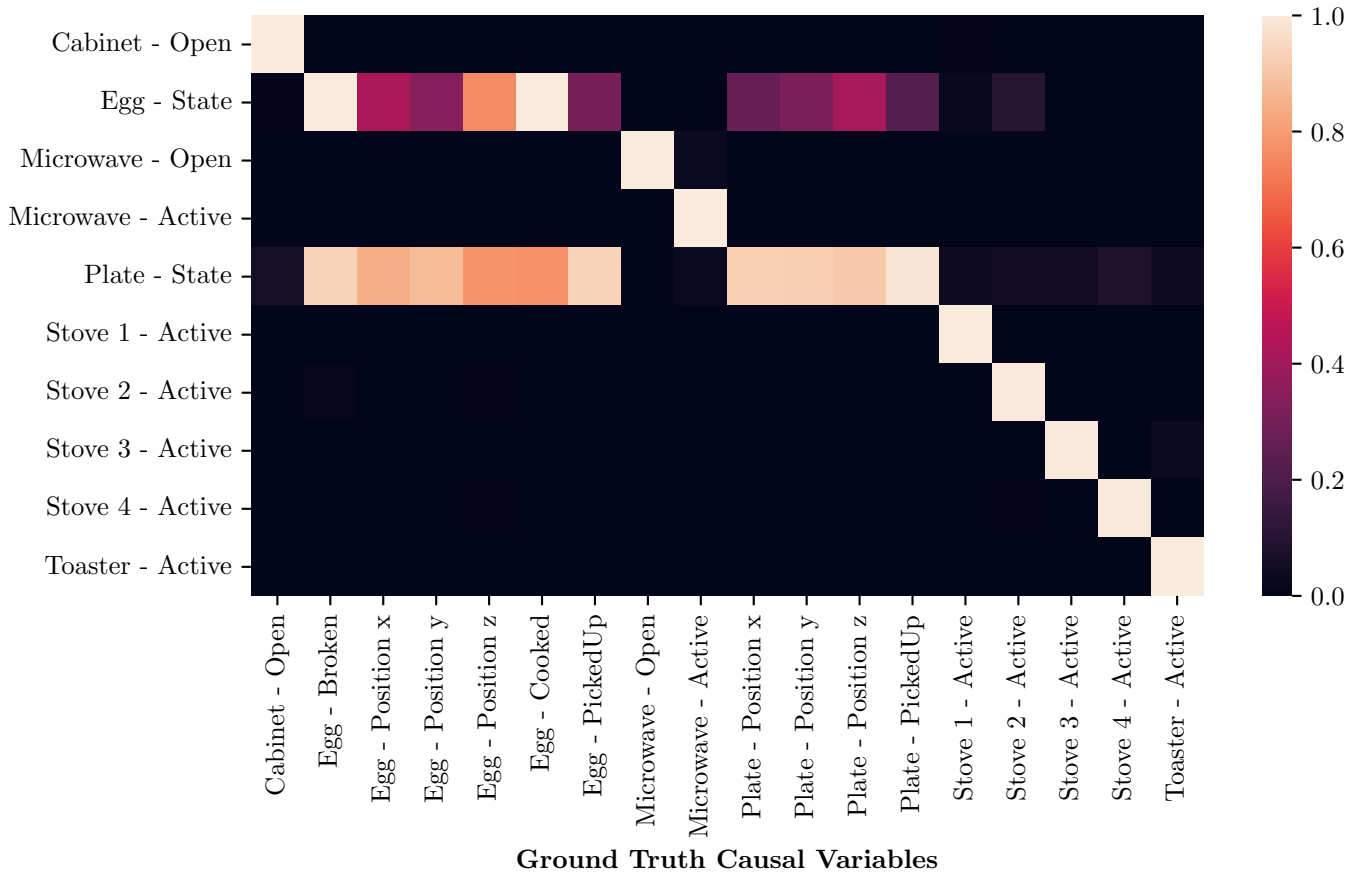

Supplement: supplementary_material [file attachment]

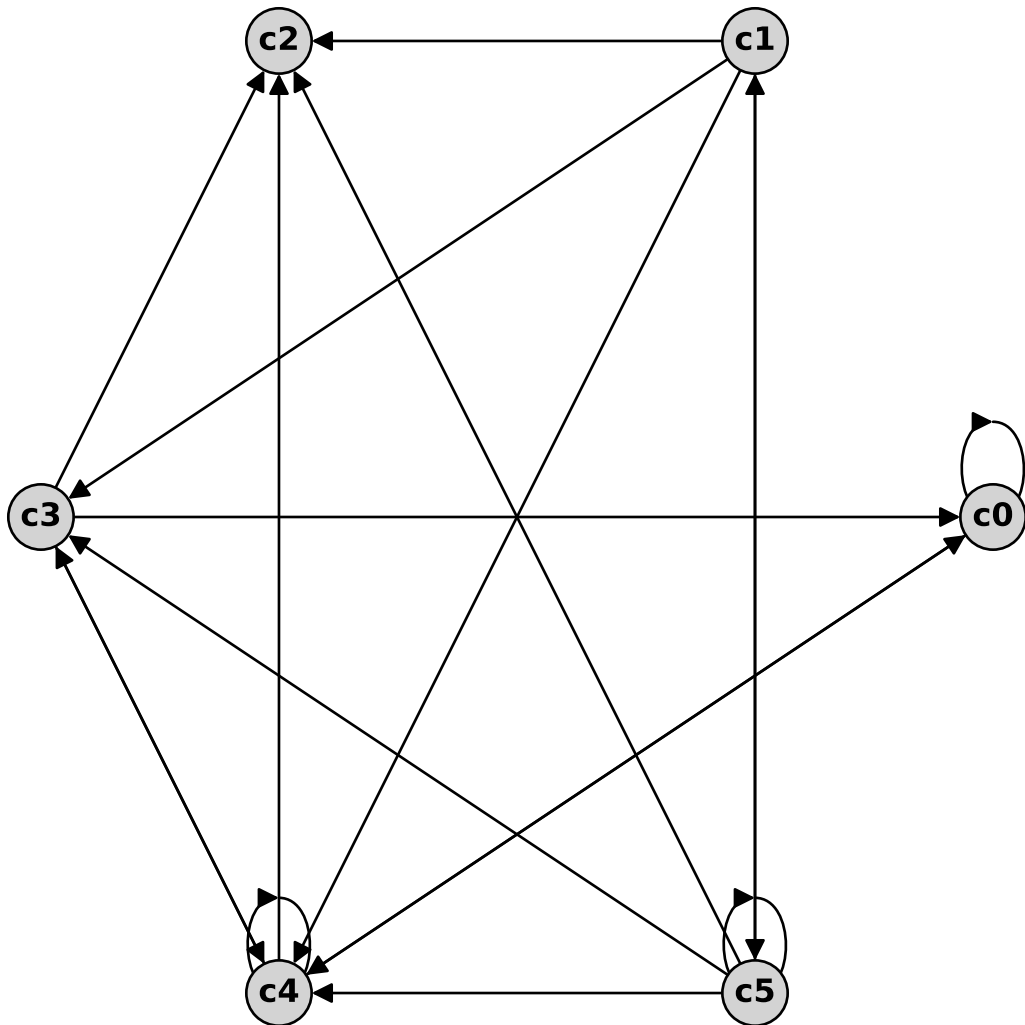

Supplement: supplementary_material [file attachment]

Predicted graph structure

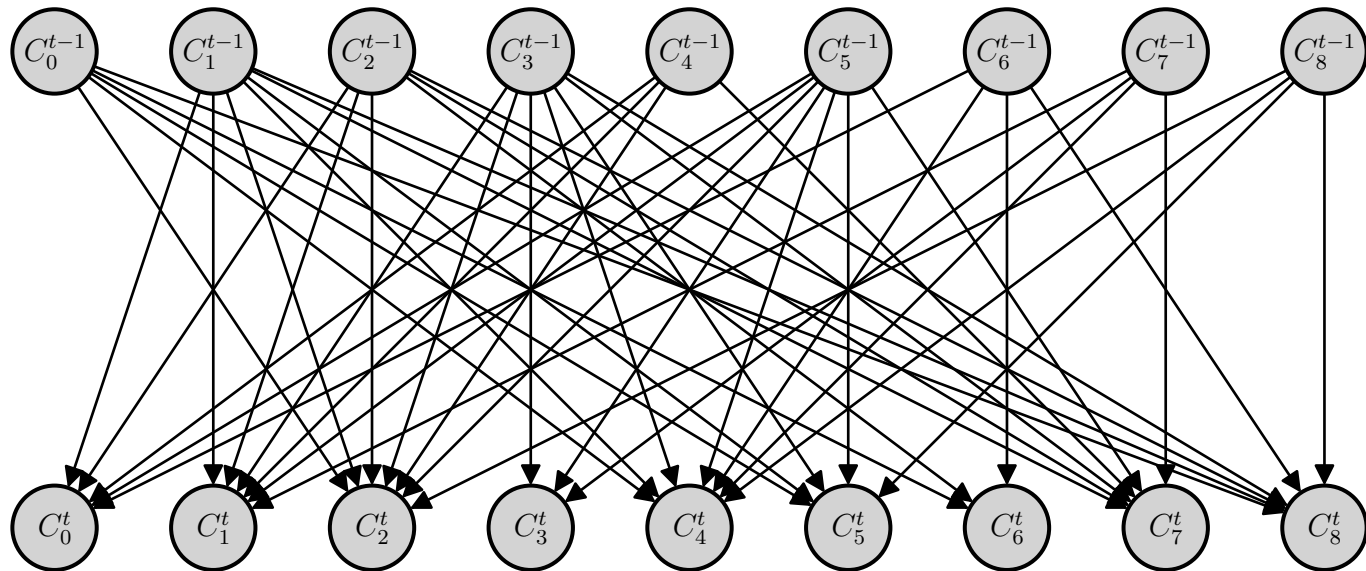

Supplement: supplementary_material [file attachment]

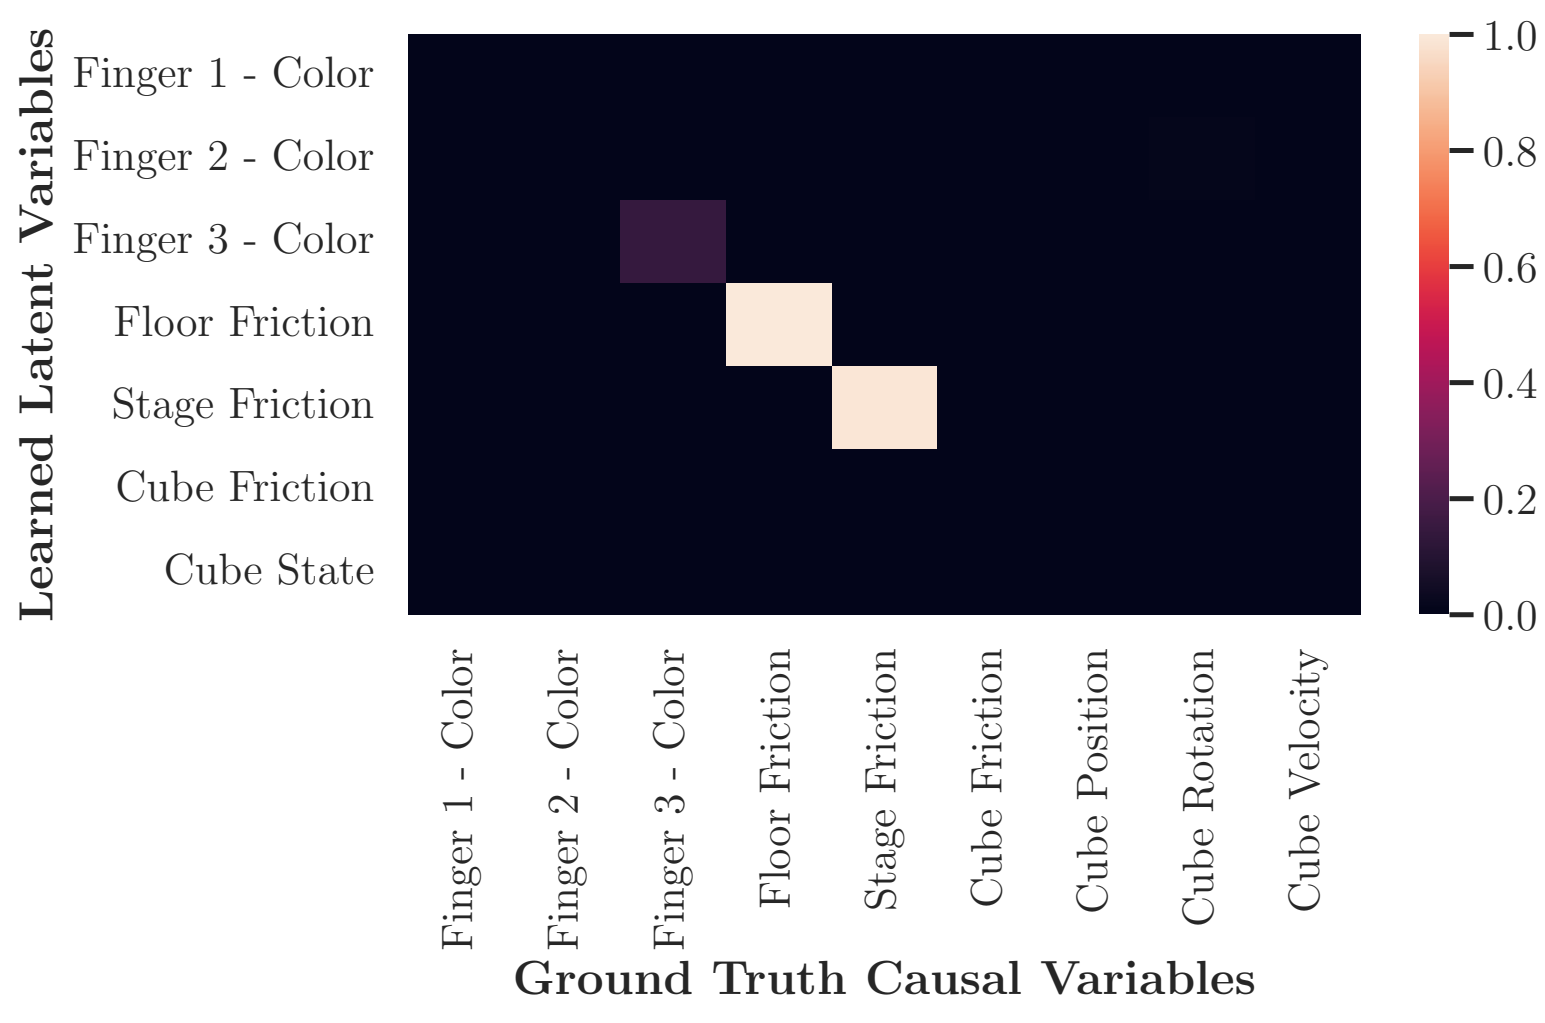

Supplement: supplementary_material [file attachment]

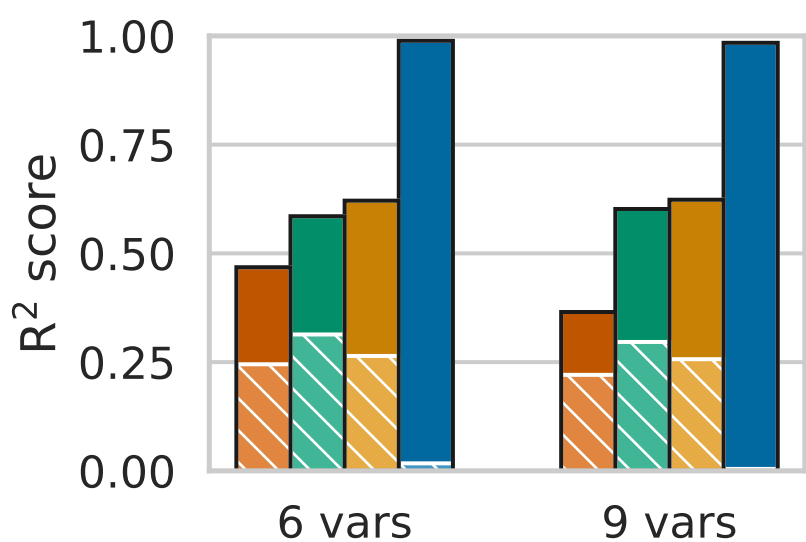

Supplement: supplementary_material [file attachment]

Ground-truth graph structure

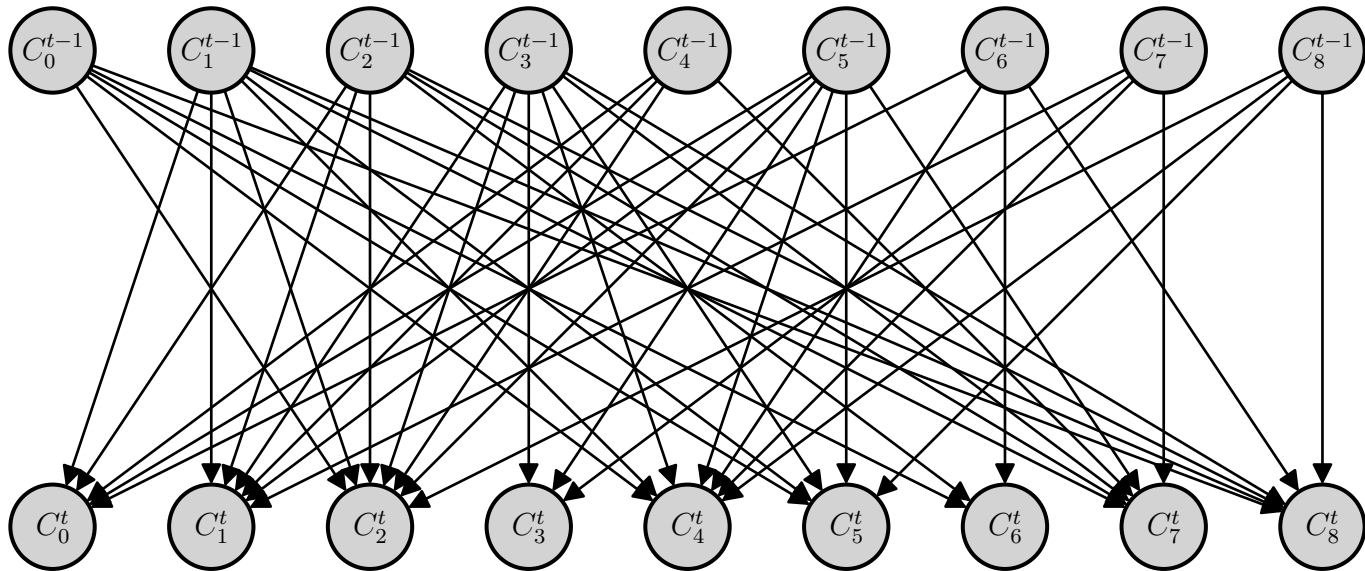

Supplement: supplementary_material [file attachment]

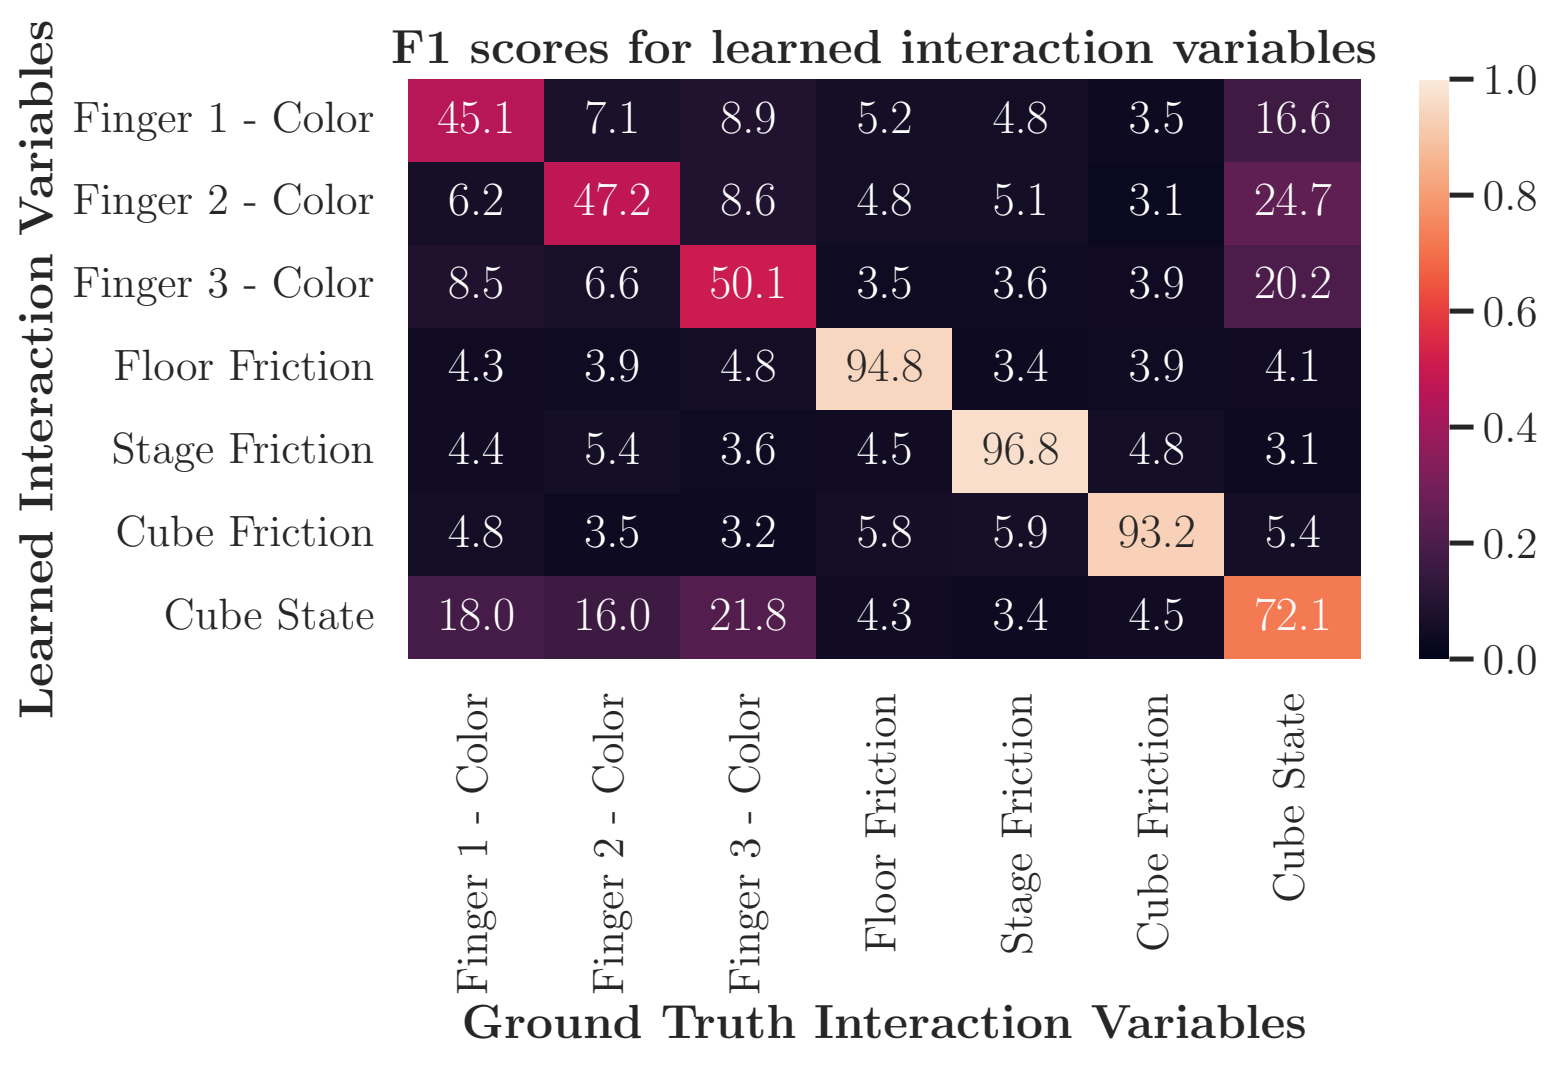

Supplement: supplementary_material [file attachment]

*Observations*

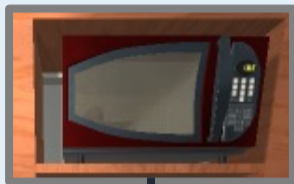

OpenObject

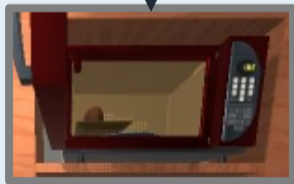

**BISCUIT** 🍪

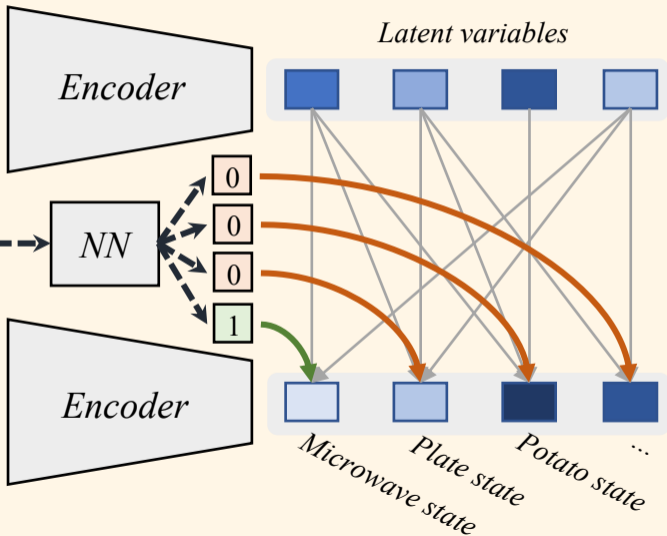

Supplement: supplementary_material [file attachment]

## Models

 iVAE     LEAP     DMS     BISCUIT (Ours)

Supplement: supplementary_material [file attachment]

# Predicted graph structure

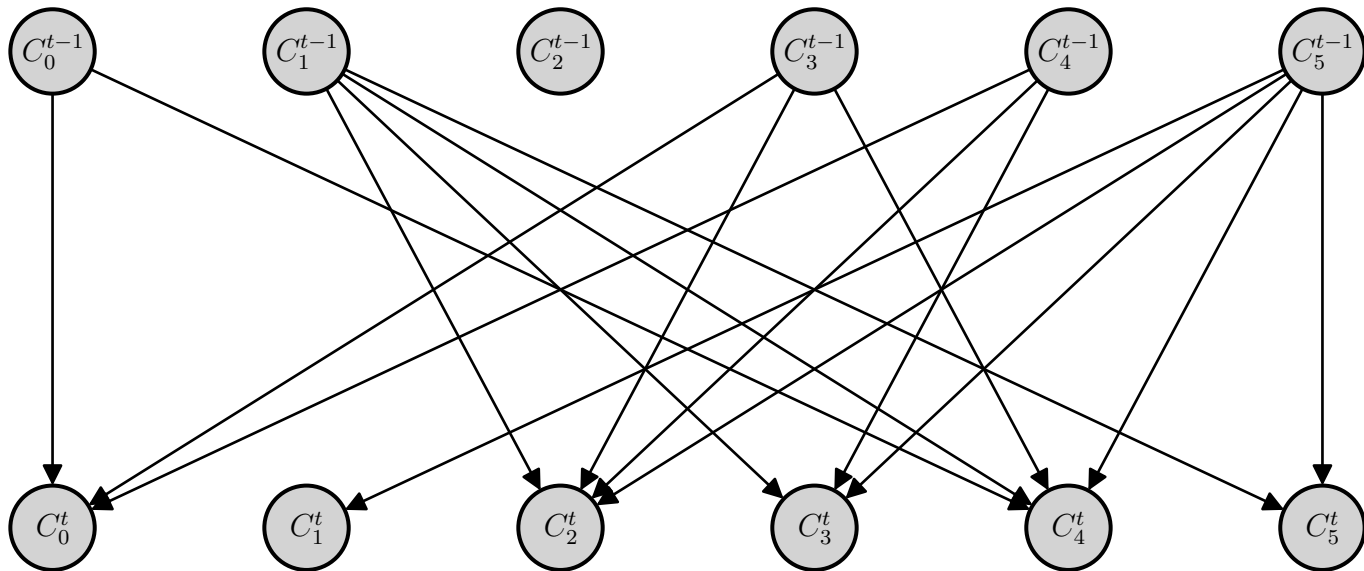

Supplement: supplementary_material [file attachment]

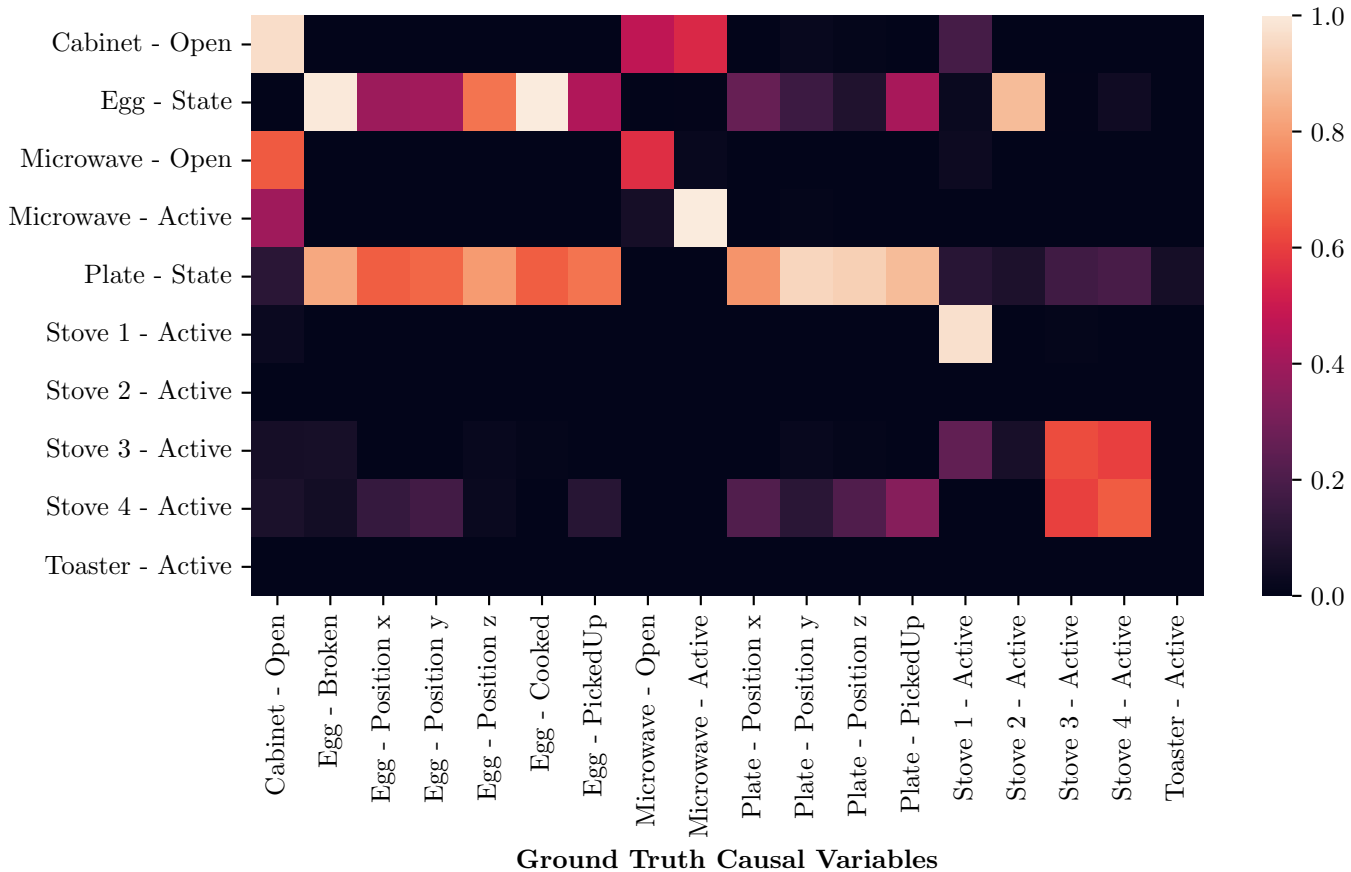

Supplement: supplementary_material [file attachment]

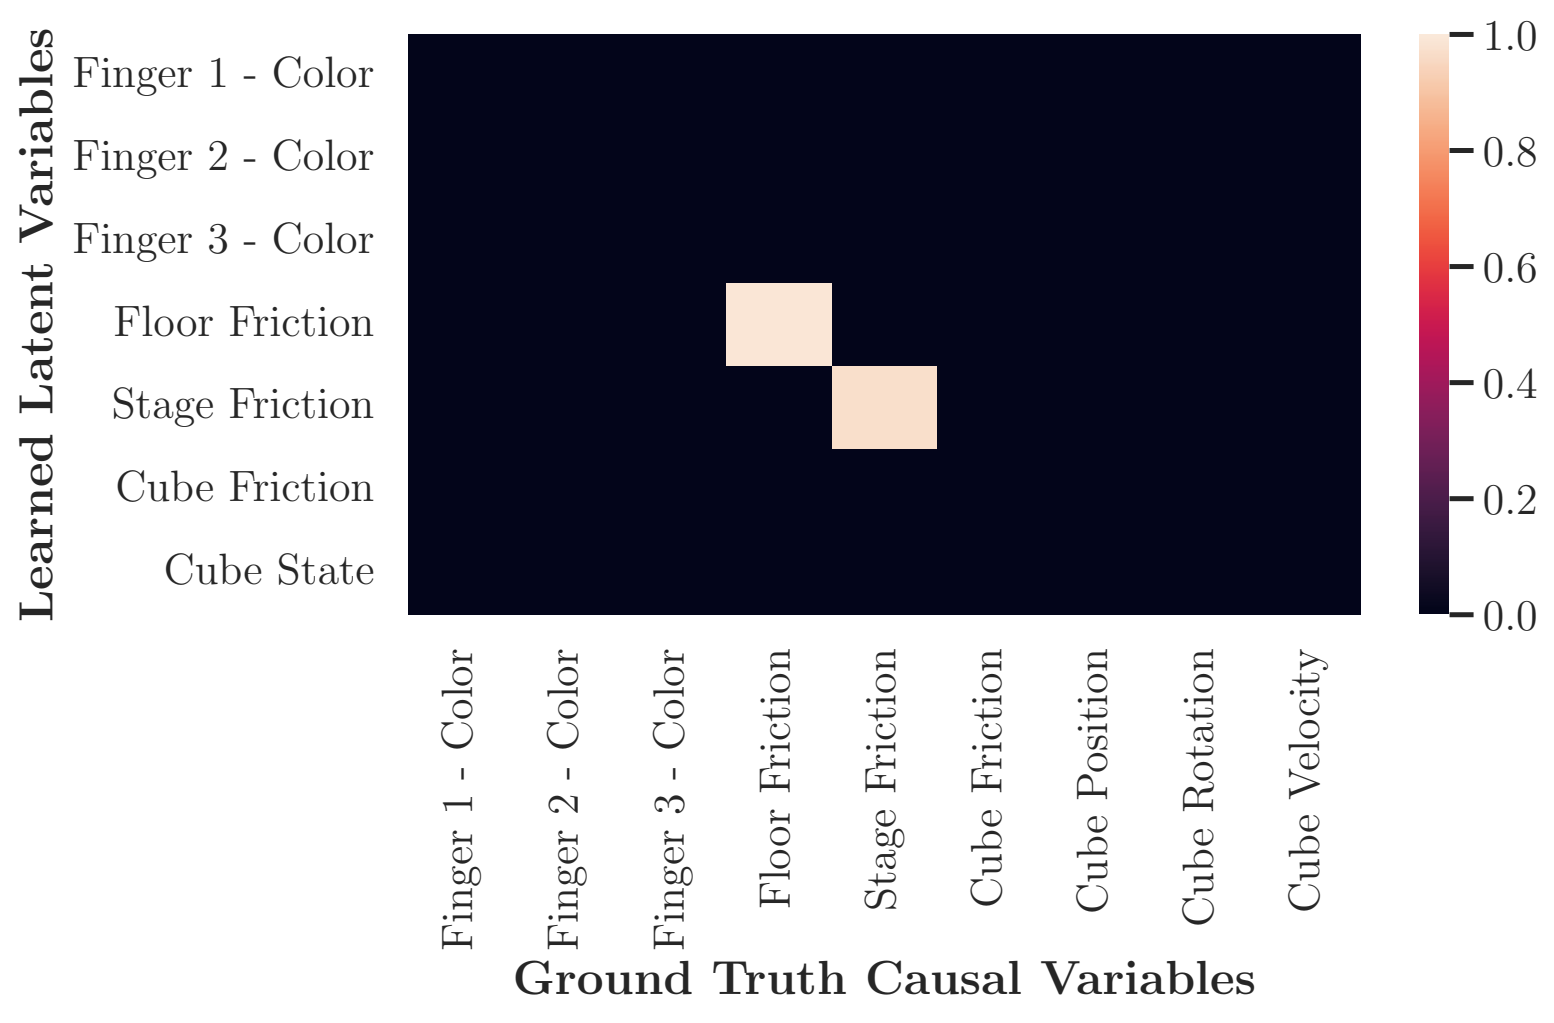

Supplement: supplementary_material [file attachment]

# Ground-truth graph structure

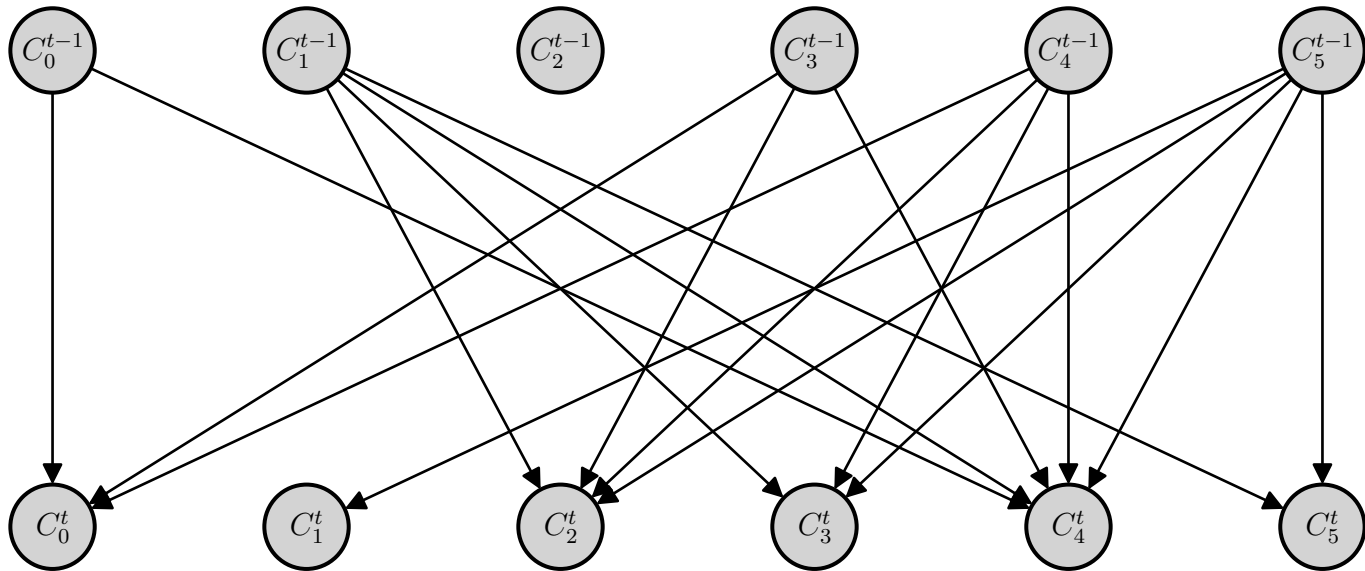

Supplement: supplementary_material [file attachment]

*Observations*

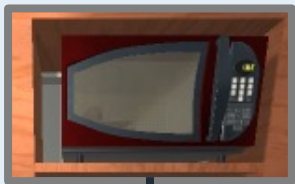

OpenObject

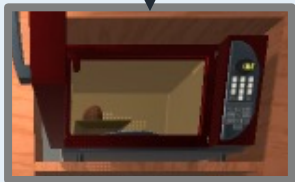

**BISCUIT** 🍪

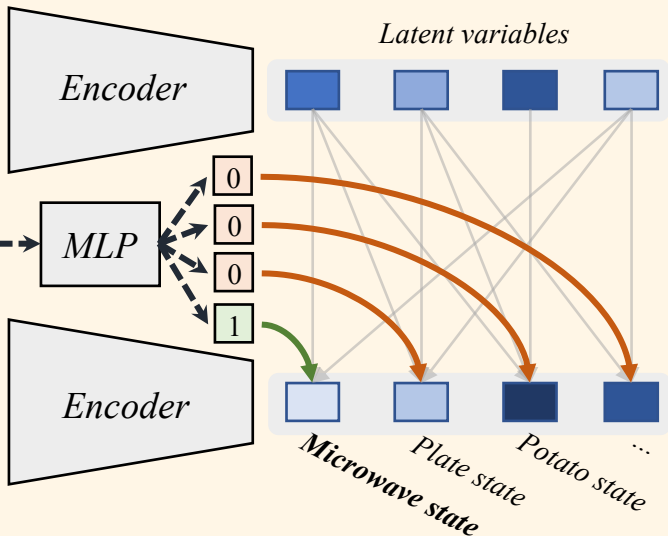

Supplement: supplementary_material [file attachment]

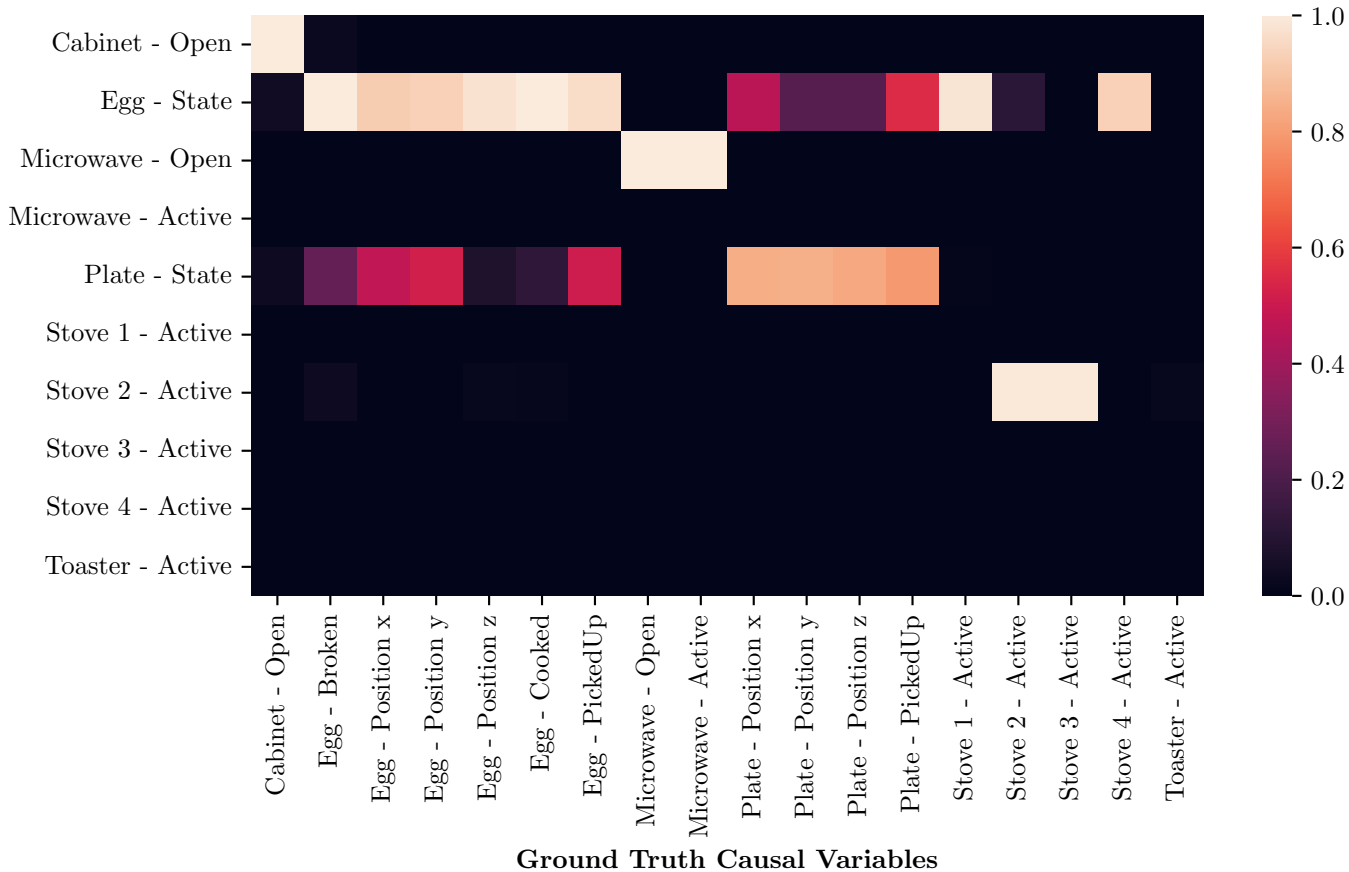

Supplement: supplementary_material [file attachment]

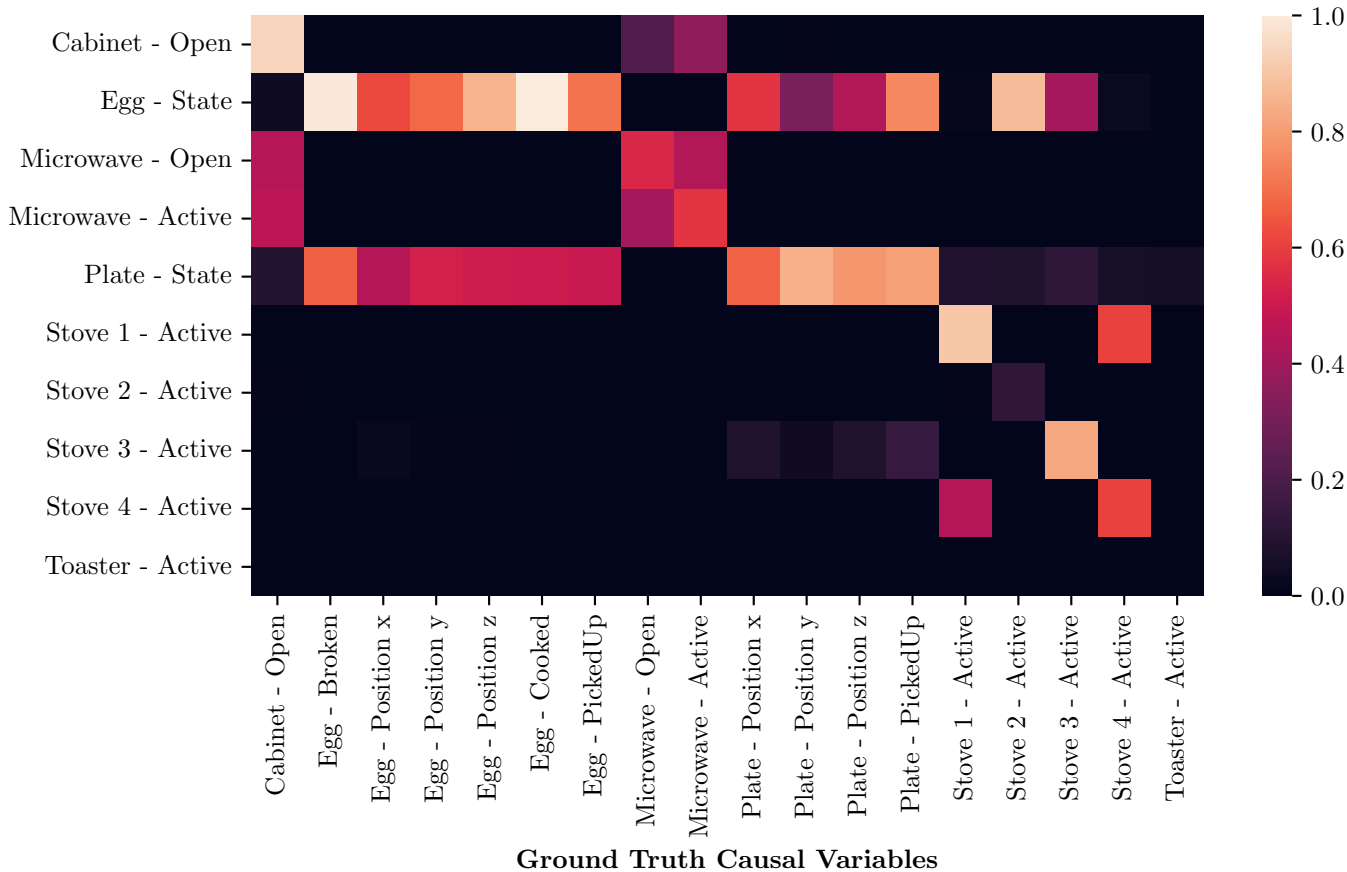

Supplement: supplementary_material [file attachment]
